# Supplementary material
Source: PubMed Central journal article supplement (PMC9326410)
Supplement: 10584_2022_3402_MOESM1_ESM.pdf [file 10584_2022_3402_MOESM1_ESM.pdf]

## Supplementary Materials

for

**On climate anxiety and the threat it may pose to daily life functioning and adaptation:**

**A study among European and African French-speaking participants**

Alexandre Heeren<sup>1,2,3</sup>, Camille Mouguiama-Douada<sup>1</sup>, & Alba Conteras<sup>1</sup>

<sup>1</sup> Psychological Science Research Institute, UCLouvain, Louvain-la-Neuve, Belgium

<sup>2</sup> Institute of Neuroscience, UCLouvain, Brussels, Belgium

<sup>3</sup> National Fund for Scientific Research (FRS-FNRS), Brussels, Belgium

Correspondence should be addressed to Alexandre Heeren, Psychological Sciences Research Institute & Institute of Neuroscience, Université catholique de Louvain, 10 Place du Cardinal Mercier, 1348 Louvain-la-Neuve, Belgium. Email: [alexandre.heeren@uclouvain](mailto:alexandre.heeren@uclouvain)

**Table S1.***Climate Anxiety and other features as a Function of Geographical Locations*

|                                            | Overall sample<br>( <i>n</i> = 2080) | African Countries<br>( <i>n</i> = 46) | European Countries<br>( <i>n</i> = 2034) | <i>t</i> or $\chi^2$ | <i>p</i> | Cohen's <i>d</i> or<br>$\phi$ |
|--------------------------------------------|--------------------------------------|---------------------------------------|------------------------------------------|----------------------|----------|-------------------------------|
| Climate anxiety                            |                                      |                                       |                                          |                      |          |                               |
| CAS, M (SD)                                | 2.06 (.70)                           | 1.99 (.68)                            | 2.06 (.70)                               | .72 <sup>a</sup>     | .47      | .10                           |
| Cognitive-emotional<br>impairments, M (SD) | 2.00 (.69)                           | 1.88 (.62)                            | 2.00 (.69)                               | 1.13 <sup>a</sup>    | .26      | .18                           |
| Functional impairments, M<br>(SD)          | 2.16 (.86)                           | 2.15 (.93)                            | 2.16 (.86)                               | .08 <sup>a</sup>     | .94      | .01                           |
| Experience of climate change, M<br>(SD)    | 2.20 (.99)                           | 2.50 (1.03)                           | 2.20 (.99)                               | 2.06 <sup>a</sup>    | .04      | .30                           |
| Pro-environmental behaviors, M<br>(SD)     | 4.07 (.56)                           | 3.92 (.62)                            | 4.08 (.56)                               | 1.75 <sup>a</sup>    | .09      | .27                           |
| Gender                                     |                                      |                                       |                                          | .31 <sup>b</sup>     | .58      | .01                           |
| Female                                     | 51.87%                               | 47.80% <sup>c</sup>                   | 52.00% <sup>c</sup>                      |                      |          |                               |
| Male                                       | 48.12%                               | 52.20% <sup>c</sup>                   | 48.00% <sup>c</sup>                      |                      |          |                               |
| Age, M (SD)                                | 43.04 (13.52)                        | 39.41 (11.56)                         | 43.23 (13.55)                            | 1.46 <sup>a</sup>    | .15      | .30                           |
| Years of Education, M (SD)                 | 16.77 (2.71)                         | 16.19 (2.71)                          | 16.79 (2.65)                             | 1.88 <sup>a</sup>    | .08      | .22                           |

**Note.** CAS = Climate Anxiety Scale (CAS; Clayton & Karazsia, 2020); M = mean score; SD = Standard Deviation. Significant differences appear in bold (at  $p < .005$ ): <sup>a</sup> Value for  $t(2078)$ ; <sup>b</sup> Value for  $\chi^2(1, N = 2080)$ ; <sup>c</sup> Value denotes percentage within geographical locations.

**Table S2.***Participants' characteristics as a function of their levels of cognitive-emotional impairments*

|                                         | Below the midpoint<br>( <i>n</i> = 1855) | Above the midpoint<br>( <i>n</i> = 225) | <i>t</i> or $\chi^2$     | <i>p</i>          | Cohen's <i>d</i> or<br>$\phi$ |
|-----------------------------------------|------------------------------------------|-----------------------------------------|--------------------------|-------------------|-------------------------------|
| Age                                     | <b>43.73 (13.59)</b>                     | <b>37.36 (11.41)</b>                    | <b>6.75<sup>a</sup></b>  | <b>&lt; .0001</b> | <b>.51</b>                    |
| Gender (%)                              |                                          |                                         | <b>24.85<sup>b</sup></b> | <b>&lt; .001</b>  | <b>.11</b>                    |
| Female                                  | <b>85.9%<sup>c</sup></b>                 | <b>14.1%<sup>c</sup></b>                |                          |                   |                               |
| Male                                    | <b>92.7%<sup>c</sup></b>                 | <b>7.3%<sup>c</sup></b>                 |                          |                   |                               |
| Years of Education, M (SD)              | 16.78 (2.72)                             | 16.68 (2.63)                            | .57 <sup>a</sup>         | .57               | .04                           |
| Climate anxiety                         |                                          |                                         |                          |                   |                               |
| CAS, M (SD)                             | <b>1.92 (.58)</b>                        | <b>3.24 (.39)</b>                       | <b>33.38<sup>a</sup></b> | <b>&lt; .0001</b> | <b>2.67</b>                   |
| Cognitive-emotional impairments, M (SD) | <b>1.84 (.55)</b>                        | <b>3.27 (.32)</b>                       | <b>38.41<sup>a</sup></b> | <b>&lt; .0001</b> | <b>3.18</b>                   |
| Functional impairments, M (SD)          | <b>2.03 (.79)</b>                        | <b>3.19 (.72)</b>                       | <b>21.13<sup>a</sup></b> | <b>&lt; .001</b>  | <b>1.54</b>                   |
| Continent (%)                           |                                          |                                         | .22 <sup>b</sup>         | .64               | .01                           |
| European                                | 89.1% <sup>d</sup>                       | 10.9% <sup>d</sup>                      |                          |                   |                               |
| African                                 | 91.3% <sup>d</sup>                       | 8.7% <sup>d</sup>                       |                          |                   |                               |
| Experience of climate change, M (SD)    | <b>2.13 (.95)</b>                        | <b>2.87 (1.02)</b>                      | <b>10.96<sup>a</sup></b> | <b>&lt; .0001</b> | <b>.75</b>                    |
| Pro-environmental behaviors, M (SD)     | <b>4.04 (.56)</b>                        | <b>4.38 (.48)</b>                       | <b>8.77<sup>a</sup></b>  | <b>&lt; .001</b>  | <b>.65</b>                    |

**Note.** CAS = Climate Anxiety Scale (CAS; Clayton & Karazsia, 2020); M = mean score; SD = Standard Deviation. Significant differences (at  $p < .005$ ) appear in bold. <sup>a</sup> Value for  $t(2078)$ ; <sup>b</sup> Value for  $\chi^2(1, N = 2080)$ ; <sup>c</sup> Value reflecting % within each gender category; <sup>d</sup> Value reflecting % within each location

**Table S3.***Participants' characteristics as a function of their levels of functional impairments*

|                                         | Below the midpoint<br>( <i>n</i> = 1649) | Above the midpoint<br>( <i>n</i> = 431) | <i>t</i> or $\chi^2$     | <i>p</i>          | Cohen's <i>d</i><br>or<br>$\phi$ |
|-----------------------------------------|------------------------------------------|-----------------------------------------|--------------------------|-------------------|----------------------------------|
| Age                                     | <b>43.83 (13.70)</b>                     | <b>40.06 (12.35)</b>                    | <b>5.18<sup>a</sup></b>  | <b>&lt; .001</b>  | <b>.29</b>                       |
| Gender (%)                              |                                          |                                         | 5.46 <sup>b</sup>        | .02               | .05                              |
| Female                                  | 81.3 % <sup>c</sup>                      | 18.7 % <sup>c</sup>                     |                          | .                 |                                  |
| Male                                    | 77.1 % <sup>c</sup>                      | 22.9% <sup>c</sup>                      |                          |                   |                                  |
| Years of Education                      | 16.80 (2.74)                             | 16.79 (2.56)                            | .24 <sup>a</sup>         | .81               | < .01                            |
| Climate anxiety                         |                                          |                                         |                          |                   |                                  |
| CAS, M (SD)                             | <b>1.82 (.54)</b>                        | <b>2.97 (.45)</b>                       | <b>40.69<sup>a</sup></b> | <b>&lt; .0001</b> | <b>2.31</b>                      |
| Cognitive-emotional impairments, M (SD) | <b>1.82 (.59)</b>                        | <b>2.67 (.60)</b>                       | <b>26.41<sup>a</sup></b> | <b>&lt; .0001</b> | <b>1.43</b>                      |
| Functional impairments, M (SD)          | <b>1.82 (.57)</b>                        | <b>3.44 (.49)</b>                       | <b>53.76<sup>a</sup></b> | <b>&lt; .0001</b> | <b>3.05</b>                      |
| Location (%)                            |                                          |                                         | .03 <sup>b</sup>         | .86               | < .01                            |
| European countries                      | 79.3% <sup>d</sup>                       | 20.7% <sup>d</sup>                      |                          |                   |                                  |
| African countries                       | 78.3% <sup>d</sup>                       | 21.7% <sup>d</sup>                      |                          |                   |                                  |
| Experience of climate change, M (SD)    | <b>2.11 (.97)</b>                        | <b>2.57 (.98)</b>                       | <b>8.82<sup>a</sup></b>  | <b>&lt; .0001</b> | <b>.47</b>                       |
| Pro-environmental behaviors, M (SD)     | <b>4.01 (.57)</b>                        | <b>4.31 (.49)</b>                       | <b>10.27<sup>a</sup></b> | <b>&lt; .0001</b> | <b>.56</b>                       |

*Note.* CAS = Climate Anxiety Scale (CAS; Clayton & Karazsia, 2020); M = mean score; SD = Standard Deviation. Significant differences (at  $p < .005$ ) appear in bold.

<sup>a</sup> Value for  $t(2078)$ ; <sup>b</sup> Value for  $\chi^2(1, N = 2080)$ ; <sup>c</sup> Value reflecting % within each gender category; <sup>d</sup> Value reflecting % within each location

**Table S4.**

*Associations between climate anxiety and pro-environmental behaviors and experience of climate change as a function of participants' levels of cognitive-emotional impairments*

|                                                                | Below the midpoint<br>( <i>n</i> = 1855) | Above the midpoint<br>( <i>n</i> = 225) | <i>Z</i>    | <i>p</i><br>(2-tailed) |
|----------------------------------------------------------------|------------------------------------------|-----------------------------------------|-------------|------------------------|
| Pro-environmental behaviors & CAS                              | <b>.40**</b>                             | <b>.13</b>                              | <b>4.12</b> | <b>&lt; .001</b>       |
| Pro-environmental behaviors & Cognitive-emotional impairments  | <b>.38**</b>                             | <b>.10</b>                              | <b>4.22</b> | <b>&lt; .001</b>       |
| Pro-environmental behaviors & Functional impairments           | <b>.34**</b>                             | <b>.11</b>                              | <b>3.43</b> | <b>&lt; .001</b>       |
| Experience of Climate Change & Climate anxiety                 | .29**                                    | .18                                     | 1.64        | .10                    |
| Experience of Climate Change & Cognitive-emotional impairments | .27**                                    | .17*                                    | 1.48        | .14                    |
| Experience of Climate Change & Functional impairments          | .25**                                    | .13                                     | 1.76        | .08                    |
| Experience of Climate Change & Pro-environmental behaviors     | .24**                                    | .12                                     | 1.75        | .08                    |

*Note.* CAS = Climate Anxiety Scale (CAS; Clayton & Karazsia, 2020). Significant differences (at  $p < .005$ ) appear in bold.

\* and \*\* denote correlations significant at  $p < .05$  and  $p < .001$ , respectively (with Bonferroni-corrected adjustment for multiple comparison).

**Table S5.**

*Associations between climate anxiety and pro-environmental behaviors and experience of climate change as a function of participants' levels of functional impairments*

|                                                                | Below the midpoint<br>( <i>n</i> = 1649) | Above the midpoint<br>( <i>n</i> = 431) | <i>Z</i>    | <i>p</i><br>(2-tailed) |
|----------------------------------------------------------------|------------------------------------------|-----------------------------------------|-------------|------------------------|
| Pro-environmental behaviors & Climate anxiety                  | <b>.40**</b>                             | <b>.16*</b>                             | <b>4.83</b> | <b>&lt; .001</b>       |
| Pro-environmental behaviors & Cognitive-emotional impairments  | <b>.37**</b>                             | <b>.17**</b>                            | <b>3.99</b> | <b>&lt; .001</b>       |
| Pro-environmental behaviors & Functional impairments           | <b>.36**</b>                             | <b>.04</b>                              | <b>6.21</b> | <b>&lt; .001</b>       |
| Experience of Climate Change & Climate anxiety                 | .32**                                    | .28*                                    | .81         | .41                    |
| Experience of Climate Change & Cognitive-emotional impairments | .30**                                    | .24*                                    | 1.19        | .23                    |
| Experience of Climate Change & Functional impairments          | .27**                                    | .22*                                    | .98         | .33                    |
| Experience of Climate Change & Pro-environmental behaviors     | .26**                                    | .12*                                    | 2.70        | .01                    |

*Note.* CAS = Climate Anxiety Scale (CAS; Clayton & Karazsia, 2020). Significant differences (at  $p < .005$ ) appear in bold.

\* and \*\* denote correlations significant at  $p < .05$  and  $p < .001$ , respectively (with Bonferroni-corrected adjustment for multiple comparison).
